# Supplementary material for: Decoupled transcript and protein concentrations ensure histone homeostasis in different nutrients
Source: PubMed Central journal article supplement (PMC11535423; doi:10.1038/s44318-024-00227-w), 2024-09-13
Supplement: 44318_2024_227_MOESM1_ESM.pdf [file 44318_2024_227_MOESM1_ESM.pdf]

## Appendix for:

# Decoupled transcript and protein concentrations ensure histone homeostasis in different nutrients

Dimitra Chatzitheodoridou<sup>1</sup>, Daniela Bureik<sup>1</sup>, Francesco Padovani<sup>1</sup>, Kalyan Varma Nadimpalli<sup>1</sup>, Kurt M. Schmoller<sup>1</sup>,

<sup>1</sup>Institute of Functional Epigenetics, Molecular Targets and Therapeutics Center, Helmholtz Zentrum München, 85764 Neuherberg, Germany \*correspondence: [kurt.schmoller@helmholtz-munich.de](mailto:kurt.schmoller@helmholtz-munich.de)

| <b>Table of contents</b> | <b>Page</b> |
|--------------------------|-------------|
| Appendix Figure S1       | 2           |
| Appendix Figure S2       | 3           |
| Appendix Table S1        | 5           |
| Appendix Table S2        | 6           |
| Appendix Table S3        | 9           |
| Appendix Table S4        | 10          |

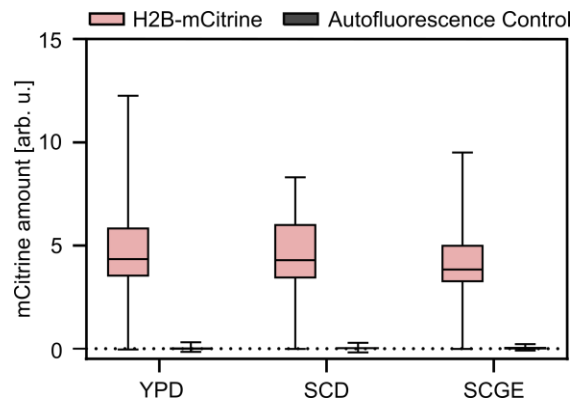

**Appendix Figure S1. Autofluorescence control for the H2B-mCitrine strain in different growth media.** Compared to H2B-mCitrine intensity, autofluorescence is negligible. Total mCitrine fluorescence intensity after background correction was measured in cells with mCitrine-tagged H2B ( $n_{\text{YPD}} = 492$ ,  $n_{\text{SCD}} = 392$ ,  $n_{\text{SCGE}} = 275$ ) and untagged H2B ( $n_{\text{YPD}} = 227$ ,  $n_{\text{SCD}} = 285$ ,  $n_{\text{SCGE}} = 215$ ). Box plots represent median and 25th and 75th percentiles, whiskers are extending to the minimum and maximum values.

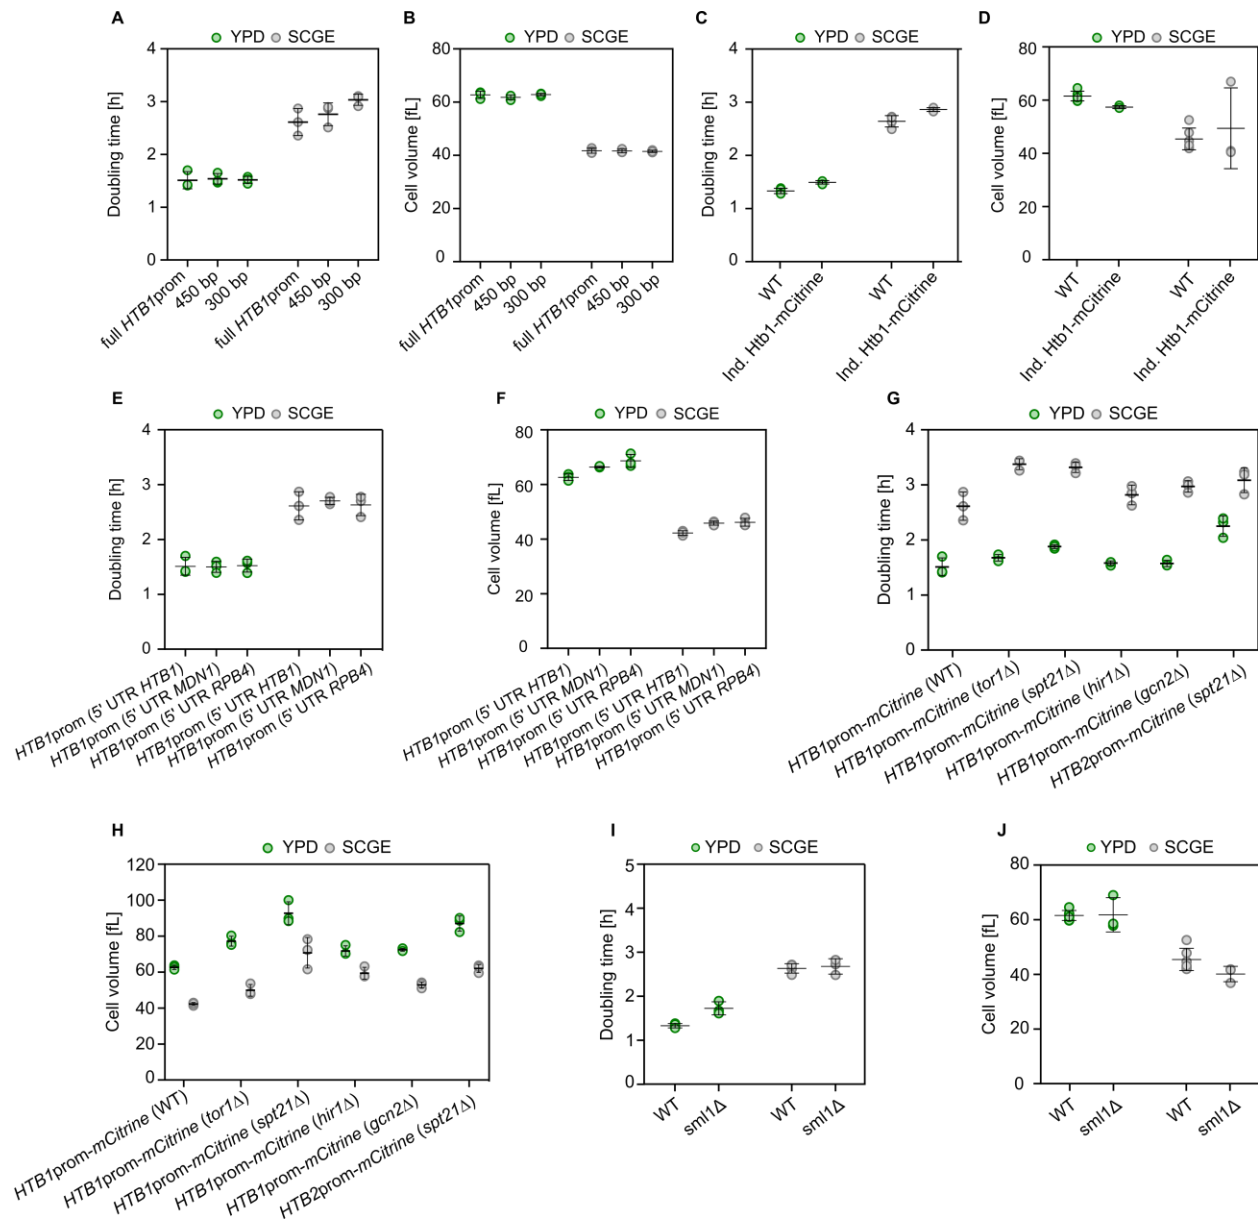

**Appendix Figure S2. Growth phenotypes of strains used in figures 4, 5 and 6.** (A) Nutrient-specific population doubling times and (B) mean volumes of cells carrying an additional copy of the full-length or truncated *HTB1* promoter driving the expression of mCitrine. Lines and error bars represent the means and standard deviations of  $n = 3$  independent measurements shown as individual dots. (C) Nutrient-specific population doubling times and (D) mean cell volumes of wildtype cells and cells with  $\beta$ -estradiol inducible *HTB1-mCitrine*. Lines and error bars represent the means and standard deviations of  $n = 3-4$  independent measurements shown as individual dots. (E) Nutrient-specific population doubling times and (F) mean volumes of cells expressing mCitrine with the *HTB1*, *MDN1* or *RPB4* 5' UTR. Lines and error bars represent the mean and standard deviation of  $n = 3$  independent measurements shown as individual dots. (G) Population doubling times and (H) mean cell volumes of wildtype, *tor1Δ*, *spt21Δ*, *hir1Δ*, and *gcn2Δ* cells

expressing *HTB1*prom-mCitrine or *HTB2*prom-mCitrine in YPD and SCGE. Lines and error bars represent the means and standard deviations of n = 3 independent measurements shown as individual dots. **(I)** Population doubling times and **(J)** mean cell volumes of wildtype and *sm11Δ* cells growing in YPD and SCGE. Lines and error bars represent the means and standard deviations of n = 3-6 independent measurements shown as individual dots.

**Appendix Table S1.** Promoter sequences used for the experiments shown in Fig. 5, in which *mCitrine* mRNA is expressed from the *HTB1* promoter with *HTB1*, *MDN1* or *RPB4* 5' UTR.

| <b>Gene feature</b>         | <b>Position relative to start codon</b>         |
|-----------------------------|-------------------------------------------------|
| <b><i>HTB1</i> promoter</b> | - 817 bp to -127 bp relative to <i>HTB1</i> ORF |
| <b><i>HTB1</i> 5' UTR</b>   | 127 bp upstream of <i>HTB1</i> ORF              |
| <b><i>MDN1</i> 5' UTR</b>   | 150 bp upstream of <i>MDN1</i> ORF              |
| <b><i>RPB4</i> 5' UTR</b>   | 125 bp upstream of <i>RPB4</i> ORF              |

**Appendix Table S2.** Strains used in this study.

| <b>Name</b>     | <b>Genotype</b>                                                                                                                                                                | <b>Description</b>                                                                                                                                 | <b>Origin</b>                   | <b>Figure</b> |
|-----------------|--------------------------------------------------------------------------------------------------------------------------------------------------------------------------------|----------------------------------------------------------------------------------------------------------------------------------------------------|---------------------------------|---------------|
| <b>ASY020-1</b> | <i>Mat α/a;</i><br><i>ADE2/ADE2,</i><br><i>URA3/ura3,</i><br><i>leu2/LEU2</i>                                                                                                  | Diploid wildtype strain                                                                                                                            | Anika Seel,<br>Schmoller<br>Lab | 6             |
| <b>CY14093</b>  | <i>Mat α;</i><br><i>sml1Δ::hphMX3</i>                                                                                                                                          | Haploid <i>sml1Δ</i> strain                                                                                                                        | Christopher<br>Bruhn            | 6, S2         |
| <b>CY14098</b>  | <i>Mat α;</i><br><i>sml1Δ::hphMX3,</i><br><i>rad53Δ::natMX6</i>                                                                                                                | Haploid<br><i>sml1Δrad53Δ</i> strain                                                                                                               | Christopher<br>Bruhn            | 6             |
| <b>CY15164</b>  | <i>Mat α;</i><br><i>sml1Δ::hphMX3,</i><br><i>rad53Δ::natMX6,</i><br><i>spt21Δ::kanMX6</i>                                                                                      | Haploid<br><i>sml1Δrad53Δ spt21Δ</i><br>strain                                                                                                     | Christopher<br>Bruhn            | 6             |
| <b>DBY020-2</b> | <i>Mat α; ADE2,</i><br><i>ura3::CglaTRP1-</i><br><i>HTB1prom-mCitrine-</i><br><i>ADH1term-URA3</i>                                                                             | Haploid strain with<br>additional copy of<br><i>HTB1</i> promoter<br>driving mCitrine                                                              | This study                      | 5             |
| <b>DBY021-3</b> | <i>Mat α; ADE2,</i><br><i>ura3::CglaTRP1-</i><br><i>HTB2prom-mCitrine-</i><br><i>ADH1term-URA3</i>                                                                             | Haploid strain with<br>additional copy of<br><i>HTB2</i> promoter<br>driving mCitrine                                                              | This study                      | 5             |
| <b>DBY054-8</b> | <i>Mat a/α ;</i><br><i>ADE2/ADE2, leu2-</i><br><i>3/LEU2, URA3/ura3-</i><br><i>1, htb1Δ::CglaTRP1/</i><br><i>/HTB1, htb2Δ::HIS3</i><br><i>/htb2Δ::NatMX6</i>                   | Diploid <i>HTB1/htb1Δ,</i><br><i>htb2Δ/htb2Δ</i> strain                                                                                            | This study                      | 6             |
| <b>DBY064-1</b> | <i>Mat α; ADE2,</i><br><i>ura3::CglaLEU2-</i><br><i>HTB1prom-mCitrine-</i><br><i>ADH1term-URA3</i>                                                                             | Haploid strain with<br>additional copy of<br><i>HTB1</i> promoter<br>driving mCitrine                                                              | This study                      | 4             |
| <b>DBY065-2</b> | <i>Mat α ; ADE2,</i><br><i>ura3::CglaLEU2-</i><br><i>HTB1prom (mutated</i><br><i>UAS3/UAS4)-</i><br><i>mCitrine-ADH1term-</i><br><i>URA3</i>                                   | Haploid strain with<br>additional copy of<br><i>HTB1</i> promoter, with<br>mutated Spt10<br>binding sites in<br>UAS3 and UAS4,<br>driving mCitrine | This study                      | 4             |
| <b>DCY001-1</b> | <i>Mat α; ADE2,</i><br><i>htb2::Htb2-linker-</i><br><i>mCitrine-ADH1term-</i><br><i>CglaTRP1,</i><br><i>htb1::Htb1-linker-</i><br><i>mCitrine-ADH1term-</i><br><i>KlacURA3</i> | Haploid strain with<br><i>HTB1</i> and <i>HTB2</i><br>tagged with mCitrine                                                                         | This study                      | 1, EV1        |

|                 |                                                                                                                        |                                                                                                                                    |            |                            |
|-----------------|------------------------------------------------------------------------------------------------------------------------|------------------------------------------------------------------------------------------------------------------------------------|------------|----------------------------|
| <b>DCY002-2</b> | <i>Mat α; ADE2, ura3::CglaTRP1-HTB2prom-mCitrine-ADH11term-URA3,his3::ACT1prom-mKate2-ADH1term-HIS3</i>                | Haploid strain with additional copy of <i>HTB2</i> promoter driving mCitrine and <i>ACT1</i> promoter driving mKate2               | This study | 3, EV3, EV4                |
| <b>DCY008-8</b> | <i>Mat α; ADE2, ura3::CglaTRP1-HTB1prom-mCitrine-ADH1term-URA3,his3::ACT1prom-mKate2-ADH1term-HIS3</i>                 | Haploid strain with additional copy of <i>HTB1</i> promoter driving mCitrine and <i>ACT1</i> promoter driving mKate2               | This study | 3, 4, 5, EV3, EV4, EV5, S2 |
| <b>DCY011-1</b> | <i>Mat α; ADE2, ura3::CglaTRP1-HTB1prom- MDN1 5'UTR-mCitrine-ADH1term-URA3</i>                                         | Haploid strain with additional copy of <i>HTB1</i> promoter expressing mCitrine with <i>MDN1</i> 5' UTR                            | This study | 5,S2                       |
| <b>DCY012-1</b> | <i>Mat α; ADE2, ura3::CglaTRP1-HTB1prom- RPB4 5'UTR-mCitrine-ADH1term-URA3</i>                                         | Haploid strain with additional copy of <i>HTB1</i> promoter expressing mCitrine with <i>RPB4</i> 5' UTR                            | This study | 5,S2                       |
| <b>DCY013-4</b> | <i>Mat α; ADE2, ura3::CglaTRP1-HTB1prom-mCitrine-ADH1term-URA3, his3::ACT1prom-mKate2-ADH1term-HIS3, tor1Δ::hphMX6</i> | Haploid <i>tor1Δ</i> strain with additional copy of <i>HTB1</i> promoter driving mCitrine and <i>ACT1</i> promoter driving mKate2  | This study | 5, S2                      |
| <b>DCY14-3</b>  | <i>Mat α; ADE2, LexApr-HTB1-mCitrine-ADH1term-URA3, his3::LexA-ER-AD-TF-HIS3</i>                                       | Haploid strain expressing β-estradiol inducible Htb1-mCitrine                                                                      | This study | EV5                        |
| <b>DCY15-1</b>  | <i>Mat α; ADE2, ura3::CglaTRP1-HTB1prom-mCitrine-ADH1term-URA3, his3::ACT1prom-mKate2-ADH1term-HIS3, spt21Δ:: LEU2</i> | Haploid <i>spt21Δ</i> strain with additional copy of <i>HTB1</i> promoter driving mCitrine and <i>ACT1</i> promoter driving mKate2 | This study | 5, S2                      |
| <b>DCY16-1</b>  | <i>Mat α; ADE2, ura3::CglaTRP1-HTB1prom-mCitrine-</i>                                                                  | Haploid <i>hir1Δ</i> strain with additional copy of <i>HTB1</i> promoter                                                           | This study | 5, S2                      |

|                  |                                                                                                                      |                                                                                                                                   |                                |                                     |
|------------------|----------------------------------------------------------------------------------------------------------------------|-----------------------------------------------------------------------------------------------------------------------------------|--------------------------------|-------------------------------------|
|                  | <i>ADH1term-URA3, his3::ACT1prom-mKate2-ADH1term-HIS3, hir1Δ::LEU2</i>                                               | driving mCitrine and <i>ACT1</i> promoter driving mKate2                                                                          |                                |                                     |
| <b>DCY17-1</b>   | <i>Mat α; ADE2, ura3::CglaTRP1-HTB1prom-mCitrine-ADH1term-URA3, his3::ACT1prom-mKate2-ADH1term-HIS3, gcn2Δ::LEU2</i> | Haploid <i>gcn2Δ</i> strain with additional copy of <i>HTB1</i> promoter driving mCitrine and <i>ACT1</i> promoter driving mKate2 | This study                     | 5, S2                               |
| <b>JE621</b>     | <i>Mat α, ADE2, TRP1, LEU2, his3::LexO transcription factor-HIS3, cdc20::natMX-lexOPr-Cdc20</i>                      | Haploid strain expressing β-estradiol inducible Cdc20                                                                             | Jennifer Ewald Lab             | 2, EV2                              |
| <b>KCY021-1</b>  | <i>Mat α; ADE2, ura3::CglaTRP1-300bpHTB1prom-mCitrine-ADH1term-URA3</i>                                              | Haploid strain with additional 300 bp truncation of <i>HTB1</i> promoter driving mCitrine                                         | Kora-Lee Claude, Schmoller Lab | 4, S2                               |
| <b>KCY022-1</b>  | <i>Mat α; ADE2, ura3::CglaTRP1-450bpHTB1prom-mCitrine-ADH1term-URA3</i>                                              | Haploid strain with additional 450 bp truncation of <i>HTB1</i> promoter driving mCitrine                                         | Kora-Lee Claude, Schmoller Lab | 4, S2                               |
| <b>KSY229-1</b>  | <i>Mat α; ADE2, ura3::CglaTRP1-ACT1prom-mCitrine-ADH1term-URA3</i>                                                   | Haploid strain with additional copy of <i>ACT1</i> promoter driving mCitrine                                                      | This study                     | 3, EV3, EV4                         |
| <b>MMY116-2C</b> | <i>Mat α; ADE2</i>                                                                                                   | Haploid wildtype strain                                                                                                           | Skotheim lab stock             | 1, 2, 3, EV1, EV2, EV3, EV4, S1, S2 |



**Appendix Table S3.** Sequences of qPCR primers used in this study.

| <b>Gene</b>     | <b>qPCR primer direction</b> | <b>qPCR primer sequence (5'-3')</b> |
|-----------------|------------------------------|-------------------------------------|
| <b>HTB1</b>     | forward                      | TACACACATACAATGTCTGCTAAAG           |
|                 | reverse                      | AGTGTCAGGGTGAGTTTGCTT               |
| <b>HTB2</b>     | forward                      | CCTCTGCCGCCGAAAAGAAA                |
|                 | reverse                      | TCTTACCATCGACGGAGGTTG               |
| <b>HTA1</b>     | forward                      | GTTGCCAAAGAAGTCTGCCA                |
|                 | reverse                      | CAGTTTAGTTCCCTCCGCCTT               |
| <b>HTA2</b>     | forward                      | TCGCCAAGGTGGTGT TTT                 |
|                 | reverse                      | TGATTTGCTTTGTTTCTTTTCAACT           |
| <b>HHF1</b>     | forward                      | TACACCGAACACGCCAAGAG                |
|                 | reverse                      | TTGCTTGTTGTTACCGTTTTCTT             |
| <b>HHF2</b>     | forward                      | ACGAAGAAGTCAGAGCCGTC                |
|                 | reverse                      | ACCGATTGTTTAACCAACCGATTG            |
| <b>HHT1</b>     | forward                      | CAATCTTCTGCCATCGGTGC                |
|                 | reverse                      | ACTGATGACAATCAACAACTATGA            |
| <b>HHT2</b>     | forward                      | AGCAAACACTCCACAATGGC                |
|                 | reverse                      | CAAGGCAACAGTACCTGGCT                |
| <b>ACT1</b>     | forward                      | AGTTGCCCCAGAAGAACACC                |
|                 | reverse                      | GGACAAAACGGCTTGATGG                 |
| <b>MDN1</b>     | forward                      | CATCAACAAACCTGACCAACTAATCC          |
|                 | reverse                      | CATCAAGGTTTTCCAAAGTGGGC             |
| <b>mCitrine</b> | forward                      | GAGCTGAAGGGCATCGACTT                |
|                 | reverse                      | TTCTGCTTGTCGGCCATGAT                |
| <b>RDN18</b>    | forward                      | AACTCACCAGGTCCAGACACAATAAGG         |
|                 | reverse                      | AAGGTCTCGTTCGTTATCGCAATTAAGC        |

**Appendix Table S4.** Sequences of qPCR primers used for mRNA stability measurements shown in figure 2B.

| <b>Gene</b> | <b>qPCR primer direction</b> | <b>qPCR primer sequence (5'-3')</b> |
|-------------|------------------------------|-------------------------------------|
| <b>HTB1</b> | forward                      | TGGCTGCGTATAACAAGAAGTCT             |
|             | reverse                      | CCAAAGGAAGTGATTTTCATTATGC           |
| <b>HTB2</b> | forward                      | TGCTCTATACTCAAACCAACAACA            |
|             | reverse                      | ATCTCTTCTTACCATCGACGGA              |
| <b>ACT1</b> | forward                      | TATGTGTAAAGCCGGTTTTGC               |
|             | reverse                      | GACAATAC CGTGTTCAATTGGG             |
